# Supplementary material for: Contribution of diet to the composition of the human gut microbiota
Source: PubMed Central journal article supplement — Microb Ecol Health Dis. 2015 Feb 4;26:10.3402/mehd.v26.26164. doi: 10.3402/mehd.v26.26164 (PMC4318938; doi:10.3402/mehd.v26.26164), 2015-02-04
Supplement: MEHD-26-26164-s001.pdf [file MEHD-26-26164-s001.pdf]

## Supplemental Material

**Table 1. Comparison of gut microbiota and SCFA changes in humans after feeding interventions with specific foods.**

| Substrate                                 | Study design*                                                                                                                                   | No of individuals        | Microbiota technique     | Microbiota changes                                                                                                                                                                                                                                                                                              | SCFA changes                                                                                  | Reference |
|-------------------------------------------|-------------------------------------------------------------------------------------------------------------------------------------------------|--------------------------|--------------------------|-----------------------------------------------------------------------------------------------------------------------------------------------------------------------------------------------------------------------------------------------------------------------------------------------------------------|-----------------------------------------------------------------------------------------------|-----------|
| Maize-based whole grain breakfast cereals | <ul style="list-style-type: none"> <li>• Healthy</li> <li>• 3 weeks</li> <li>• Cross-over</li> </ul>                                            | 32<br>(women and men)    | FISH                     | <ul style="list-style-type: none"> <li>↑ <i>Bifidobacterium</i> spp.</li> <li><i>Atobobium cluster</i> spp.</li> </ul>                                                                                                                                                                                          | No changes in lactic, acetic, propionic, butyric, valeric acid and branched-chain fatty acids | (1)       |
| Whole grain wheat cereals or wheat bran   | <ul style="list-style-type: none"> <li>• Healthy</li> <li>• 3 weeks (wash-out 2 weeks)</li> <li>• Cross-over</li> </ul>                         | 31<br>(16 women, 15 men) | FISH                     | <ul style="list-style-type: none"> <li>↑ <i>Bifidobacteria</i> (whole grain)</li> <li><i>Lactobacilli/Enterococci</i> (both products)</li> <li><i>Clostridium</i> (wheat bran)</li> </ul>                                                                                                                       | No changes in acetic, propionic or caproic acid                                               | (2)       |
| Whole grain barley, brown rice or mix     | <ul style="list-style-type: none"> <li>• Healthy</li> <li>• 4 weeks (wash-out 2 weeks)</li> <li>• Cross-over</li> </ul>                         | 28<br>(17 women 11 men)  | pyrosequencing           | <ul style="list-style-type: none"> <li>↑ <i>Firmincutes</i> (all treatments)</li> <li><i>Blautia, Roseburia, Bifidobacterium, Dialister</i> (whole grain barley)</li> <li>↓ <i>Bacteroidetes</i> (all treatments)</li> <li><i>Bacteroides</i> (mix)</li> <li><i>Odoribacter</i> (whole grain barley)</li> </ul> | n.d.                                                                                          | (3)       |
| Rye bread                                 | <ul style="list-style-type: none"> <li>• Metabolic syndrome</li> <li>• 12 weeks</li> <li>• Parallel</li> </ul>                                  | 51<br>(26 women, 25 men) | HITChip and qPCR         | <ul style="list-style-type: none"> <li>↓ <i>Bryantella formatexigans</i></li> </ul>                                                                                                                                                                                                                             | n.d.                                                                                          | (4)       |
| Wild blueberry drink                      | <ul style="list-style-type: none"> <li>• Healthy</li> <li>• 6 weeks (wash-out 6 weeks)</li> <li>• Cross-over</li> </ul>                         | 20 men                   | Real-time PCR            | <ul style="list-style-type: none"> <li>↑ <i>Bifidobacterium</i> spp., <i>Lactobacillus acidophilus</i></li> </ul>                                                                                                                                                                                               | n.d.                                                                                          | (5)       |
| Wild blueberry drink                      | <ul style="list-style-type: none"> <li>• Healthy</li> <li>• 6 weeks (wash-out 6 weeks)</li> <li>• Cross-over</li> </ul>                         | 20 men                   | Real-time qPCR           | <ul style="list-style-type: none"> <li>↑ <i>B. longum</i> subsp. <i>infantis</i></li> </ul>                                                                                                                                                                                                                     | n.d.                                                                                          | (6)       |
| Red wine, dealcoholized red wine, gin     | <ul style="list-style-type: none"> <li>• Healthy</li> <li>• 20 days (no wash-out between intervention periods)</li> <li>• Cross-over</li> </ul> | 10 men                   | PCR-DGGE Sequencing qPCR | <ul style="list-style-type: none"> <li>↑ <i>Bacteroidetes, Firmicutes, E.rectale group, Bacteroides, B. uniformis Prevotella</i> (red wine)</li> <li><i>Fusobacteria, Proteobacteria, Bifidobacterium, Eggerthella lenta Enterococcus</i>(both wines)</li> </ul>                                                | n.d.                                                                                          | (7)       |

|                                                                         |                                                                                                                         |                          |                            |                                                                                                                                                                                              |                                                                                                                 |      |
|-------------------------------------------------------------------------|-------------------------------------------------------------------------------------------------------------------------|--------------------------|----------------------------|----------------------------------------------------------------------------------------------------------------------------------------------------------------------------------------------|-----------------------------------------------------------------------------------------------------------------|------|
| Almonds and pistachios (2 studies)                                      | <ul style="list-style-type: none"> <li>• Healthy</li> <li>• 18 days (wash-out 2 weeks)</li> <li>• Cross-over</li> </ul> | 18                       | DGGE, qPCR, pyrosequencing | <ul style="list-style-type: none"> <li>↑ Butyrate-producing bacteria (Pistachio)</li> <li>↓ Lactic acid bacteria (pistachio)</li> </ul>                                                      | n.d.                                                                                                            | (8)  |
| almonds and almond peel<br>Positive control:<br>Fructo-oligosaccharides | <ul style="list-style-type: none"> <li>• Healthy</li> <li>• 6 weeks</li> <li>• Parallel</li> </ul>                      | 48<br>(24 women, 24 men) | Culturing                  | <ul style="list-style-type: none"> <li>↑ <i>Bifidobacterium</i> spp.<br/><i>Lactobacillus</i> spp.</li> <li>↓ <i>Clostridium perfringens</i> (FO and almond peel)</li> </ul>                 | n.d.                                                                                                            | (9)  |
| Apple                                                                   | <ul style="list-style-type: none"> <li>• Healthy</li> <li>• 2 weeks</li> <li>• Compared with baseline</li> </ul>        | 8 men                    | Culturing                  | <ul style="list-style-type: none"> <li>↑ <i>Bifidobacteria</i></li> <li>↓ <i>Clostridia</i></li> </ul>                                                                                       | ↑ Acetic acid (tendency)                                                                                        | (10) |
| Banana or banana drink<br>(Control: water)                              | <ul style="list-style-type: none"> <li>• Healthy</li> <li>• 60 days</li> <li>• Parallel</li> </ul>                      | 34 women                 | Culturing                  | ↑ <i>Bifidobacterium</i> (banana)                                                                                                                                                            | No changes in acetic, propionic, butyric acids and branched-chain fatty acids                                   | (11) |
| Chickpea or raffinose                                                   | <ul style="list-style-type: none"> <li>• Healthy</li> <li>• 3 weeks</li> <li>• Cross-over</li> </ul>                    | 12<br>(5 women, 7 men)   | T-RFLP, qPCR               | ↓ <i>Clostridium</i> cluster XI, <i>Clostridium</i> cluster I/II                                                                                                                             | No changes in, acetic, propionic, butyric, valeric, caproic, heptanoic, lactic acid, branched-chain fatty acids | (12) |
| Soy milk low-glycinin<br>soy milk, bovine milk                          | <ul style="list-style-type: none"> <li>• Overweight</li> <li>• 3 month</li> <li>• parallel</li> </ul>                   | 64 men                   | qPCR, bTEFAP .             | <ul style="list-style-type: none"> <li>↑ <i>Bacteroid-Prevotella</i>(low glycinin soy milk), <i>Lactobacillus</i> (bovine milk)</li> <li>↓ <i>Bifidobacterium</i> (both soymilks)</li> </ul> | n.d.                                                                                                            | (13) |

n.d.: not determined

Studies which are marked with blue have been excluded from the review due to flaws in study design or due to a targeted approach.

**Table 2. Comparison of gut microbiota and SCFA changes in humans after intake of dietary fibres with varying chemical characteristics.**

| Substrate                                | Study design*                                                                                                     | No of individuals      | Microbiota technique                           | Microbiota changes                                                                                                                                                  | SCFA changes   | Reference |
|------------------------------------------|-------------------------------------------------------------------------------------------------------------------|------------------------|------------------------------------------------|---------------------------------------------------------------------------------------------------------------------------------------------------------------------|----------------|-----------|
| Resistant starch (type 3)                | <ul style="list-style-type: none"> <li>Overweight</li> <li>10 weeks</li> <li>Cross-over</li> </ul>                | 14 men                 | Denaturing-gradient gel electrophoresis (DGGE) | ↑ <i>Ruminococcus bromii</i><br><i>Oscillibacter</i> (unclassified species)<br><i>Eubacterium rectale</i>                                                           | n.d.           | (14)      |
| Resistant starch (type 2 and 4)          | <ul style="list-style-type: none"> <li>Healthy</li> <li>3 weeks</li> <li>Cross-over</li> </ul>                    | 10                     | 16S rRNA pyrosequencing                        | RS4:<br>↑ <i>Bifidobacterium adoloscentis</i><br><i>Parabacteroides distasonis</i><br><br>RS2:<br>↑ <i>Ruminococcus bromii</i><br><i>Eubacterium rectale</i>        | n.d.           | (15)      |
| Inulin and partially hydrolyzed guar gum | <ul style="list-style-type: none"> <li>Constipated</li> <li>3 weeks</li> <li>Parallel</li> </ul>                  | 60 women               | RT-PCR                                         | ↓ <i>Clostridium</i>                                                                                                                                                | No differences | (16)      |
| Inulin and fructo-oligosaccharide        | <ul style="list-style-type: none"> <li>Radiotherapy patients</li> <li>29 days</li> <li>Parallel</li> </ul>        | 31 women               | Culturing                                      | ↑ <i>Lactobacillus</i><br><i>Bifidobacterium</i>                                                                                                                    | n.d.           | (17)      |
| Inulin and oligofructose                 | <ul style="list-style-type: none"> <li>Obese</li> <li>3 months</li> <li>Parallel</li> </ul>                       | 30 women               | Microarray and qPCR                            | ↑ <i>Faecalibacterium prausnitzii</i><br><i>Bifidobacterium</i><br><br>↓ <i>Bacteroides intestinalis</i><br><i>Bacteroides vulgatus</i><br><i>Propionibacterium</i> | n.d.           | (18)      |
| Long-chain inulin                        | <ul style="list-style-type: none"> <li>Healthy</li> <li>3 weeks (3 weeks wash-out)</li> <li>Cross-over</li> </ul> | 32<br>18 women, 14 men | FISH and RT-PCR                                | ↑ <i>Bifidobacterium</i><br>Lactobacilli/Enterococci<br><i>Atopobium</i><br><br>↓ <i>Bacteroides/Prevotella</i>                                                     | No differences | (19)      |

|                                                   |                                                                                                                         |                          |                         |                                                                                                                                                                                                           |          |      |
|---------------------------------------------------|-------------------------------------------------------------------------------------------------------------------------|--------------------------|-------------------------|-----------------------------------------------------------------------------------------------------------------------------------------------------------------------------------------------------------|----------|------|
| Fructo-oligosaccharides and pea fibre             | <ul style="list-style-type: none"> <li>• Healthy</li> <li>• 14 days (wash-out 6 weeks)</li> <li>• Cross-over</li> </ul> | 10<br>(6 women, 4 men)   | FISH                    | ↑ <i>Bifidobacterium</i>                                                                                                                                                                                  | n.d.     | (20) |
| Xylo-oligosaccharides and inulin                  | <ul style="list-style-type: none"> <li>• Healthy</li> <li>• 4 weeks</li> <li>• Cross-over</li> </ul>                    | 60<br>(34 women, 26 men) | qPCR                    | ↑ <i>Bifidobacterium</i>                                                                                                                                                                                  | Butyrate | (21) |
| Galacto-oligosaccharides                          | <ul style="list-style-type: none"> <li>• Overweight</li> <li>• 12 weeks</li> <li>• Cross-over</li> </ul>                | 45<br>(29 women, 16 men) | FISH                    | ↑ <i>Bifidobacterium</i><br>↓ <i>Bacteroides spp.</i><br><i>Clostridium histolyticum</i>                                                                                                                  | n.d.     | (22) |
| Galacto-oligosaccharides, fructo-oligosaccharides | <ul style="list-style-type: none"> <li>• Healthy infants</li> <li>• 4 months</li> <li>• Parallel</li> </ul>             | 224                      | FISH                    | ↑ <i>Bifidobacteria</i>                                                                                                                                                                                   | n.d.     | (23) |
| Polydextrose and soluble corn fibre               | <ul style="list-style-type: none"> <li>• Healthy</li> <li>• 21 days</li> <li>• Parallel</li> </ul>                      | 20 men                   | 16S rRNA pyrosequencing | ↑ <i>Clostridiaceae</i><br><i>Faecalibacterium prausnitzii</i><br><i>Phasolarcibacterium</i><br><i>Dialister</i><br><i>Lactobacillus (corn fibre)</i><br>↓ <i>Eubacteriaceae</i><br><i>Actinobacteria</i> | n.d.     | (24) |
| Polydextrose                                      | <ul style="list-style-type: none"> <li>• Healthy</li> <li>• 3 weeks</li> <li>• Parallel</li> </ul>                      | 31<br>(16 women, 15 men) | qPCR                    | ↑ <i>Ruminococcus intestinalis</i><br><i>Clostridium clusters I, II and IV</i><br>↓ <i>Lactobacillus/Enterococcus</i>                                                                                     | n.d.     | (25) |

|                        |                                                                                                                                                 |                          |                         |                                                                                                                                                                                                                             |                                                                                                            |      |
|------------------------|-------------------------------------------------------------------------------------------------------------------------------------------------|--------------------------|-------------------------|-----------------------------------------------------------------------------------------------------------------------------------------------------------------------------------------------------------------------------|------------------------------------------------------------------------------------------------------------|------|
| Resistant maltodextrin | <ul style="list-style-type: none"> <li>• Healthy</li> <li>• 24 days/treatment, 3 treatments</li> <li>• Cross-over</li> </ul>                    | 15 men                   | 16S rRNA pyrosequencing | <ul style="list-style-type: none"> <li>↑ <i>Ruminococcus</i></li> <li><i>Eubacterium</i></li> <li><i>Lachnospiraceae</i></li> <li><i>Bacteroides</i></li> <li><i>Holdemania</i></li> <li><i>Faecalibacterium</i></li> </ul> |                                                                                                            | (26) |
| Arabinoxylans          | <ul style="list-style-type: none"> <li>• Healthy</li> <li>• 21 days/treatment, 5 treatments (21 days wash-out)</li> <li>• Cross-over</li> </ul> | 40<br>(20 women, 20 men) | FISH                    | <ul style="list-style-type: none"> <li>↑ <i>Eubacterium rectale</i></li> <li><i>Roseburia/Eubacterium</i></li> <li><i>Faecalibacterium prausnitzii</i></li> <li><i>Bacteroides</i></li> </ul>                               | <ul style="list-style-type: none"> <li>↑ Butyrate</li> <li>↓ Iso-butyrate</li> <li>Iso-valerate</li> </ul> | (27) |
| Arabinoxylans          | <ul style="list-style-type: none"> <li>• Healthy</li> <li>• 3 weeks (4 weeks wash-out)</li> <li>• Cross-over</li> </ul>                         | 20<br>(14 women, 6 men)  | RT-PCR                  | <ul style="list-style-type: none"> <li>↑ <i>Bifidobacterium</i></li> </ul>                                                                                                                                                  |                                                                                                            | (28) |

n.d. not determined

Studies which are marked with blue have been excluded from the review due to flaws in study design or due to a targeted approach.

## Literature

1. Carvalho-Wells AL, Helmolz K, Nodet C, Molzer C, Leonard C, McKeivith B et al. Determination of the in vivo prebiotic potential of a maize-based whole grain breakfast cereal: a human feeding study. *Br J Nutr* 2010; 104: 1353-6.
2. Costabile A, Klinder A, Fava F, Napolitano A, Fogliano V, Leonard C et al. Whole-grain wheat breakfast cereal has a prebiotic effect on the human gut microbiota: a double-blind, placebo-controlled, crossover study. *Br J Nutr* 2008; 99: 110-20.
3. Martinez I, Lattimer JM, Hubach KL, Case JA, Yang J, Weber CG et al. Gut microbiome composition is linked to whole grain-induced immunological improvements. *ISME J* 2013; 7: 269-80.
4. Lappi J, Salojarvi J, Kolehmainen M, Mykkanen H, Poutanen K, de Vos WM et al. Intake of whole-grain and fiber-rich rye bread versus refined wheat bread does not differentiate intestinal microbiota composition in Finnish adults with metabolic syndrome. *J Nutr* 2013; 143: 648-55.
5. Vendrame S, Guglielmetti S, Riso P, Arioli S, Klimis-Zacas D, Porrini M. Six-week consumption of a wild blueberry powder drink increases bifidobacteria in the human gut. *J Agric Food Chem* 2011; 59: 12815-20.
6. Guglielmetti S, Fracassetti D, Taverniti V, Del Bo C., Vendrame S, Klimis-Zacas D et al. Differential modulation of human intestinal bifidobacterium populations after consumption of a wild blueberry (*Vaccinium angustifolium*) drink. *J Agric Food Chem* 2013; 61: 8134-40.
7. Queipo-Ortuno MI, Boto-Ordóñez M, Murri M, Gomez-Zumaquero JM, Clemente-Postigo M, Estruch R et al. Influence of red wine polyphenols and ethanol on the gut microbiota ecology and biochemical biomarkers. *Am J Clin Nutr* 2012; 95: 1323-34.
8. Ukhanova M, Wang X, Baer DJ, Novotny JA, Fredborg M, Mai V. Effects of almond and pistachio consumption on gut microbiota composition in a randomised cross-over human feeding study. *Br J Nutr* 2014; 111: 2146-52.
9. Liu Z, Lin X, Huang G, Zhang W, Rao P, Ni L. Prebiotic effects of almonds and almond skins on intestinal microbiota in healthy adult humans. *Anaerobe* 2014; 26: 1-6.
10. Shinohara K, Ohashi Y, Kawasumi K, Terada A, Fujisawa T. Effect of apple intake on fecal microbiota and metabolites in humans. *Anaerobe* 2010; 16: 510-5.
11. Mitsou EK, Kougia E, Nomikos T, Yannakoulia M, Mountzouris KC, Kyriacou A. Effect of banana consumption on faecal microbiota: a randomised, controlled trial. *Anaerobe* 2011; 17: 384-7.
12. Fernando WM, Hill JE, Zello GA, Tyler RT, Dahl WJ, Van Kessel AG. Diets supplemented with chickpea or its main oligosaccharide component raffinose modify faecal microbial composition in healthy adults. *Benef Microbes* 2010; 1: 197-207.

13. Fernandez-Raudales D, Hoeflinger JL, Bringe NA, Cox SB, Dowd SE, Miller MJ et al. Consumption of different soymilk formulations differentially affects the gut microbiomes of overweight and obese men. *Gut Microbes* 2012; 3: 490-500.
14. Walker AW, Ince J, Duncan SH, Webster LM, Holtrop G, Ze X et al. Dominant and diet-responsive groups of bacteria within the human colonic microbiota. *ISME J* 2011; 5: 220-30.
15. Martinez I, Kim J, Duffy PR, Schlegel VL, Walter J. Resistant starches types 2 and 4 have differential effects on the composition of the fecal microbiota in human subjects. *PLoS One* 2010; 5: e15046.
16. Linetzky WD, Alves Pereira CC, Logullo L, Manzoni JT, Almeida D, Teixeira da Silva ML et al. Microbiota benefits after inulin and partially hydrolyzed guar gum supplementation: a randomized clinical trial in constipated women. *Nutr Hosp* 2012; 27: 123-9.
17. Garcia-Peris P, Velasco C, Lozano MA, Moreno Y, Paron L, de la Cuerda C et al. Effect of a mixture of inulin and fructo-oligosaccharide on *Lactobacillus* and *Bifidobacterium* intestinal microbiota of patients receiving radiotherapy: a randomised, double-blind, placebo-controlled trial. *Nutr Hosp* 2012; 27: 1908-15.
18. Dewulf EM, Cani PD, Claus SP, Fuentes S, Puylaert PG, Neyrinck AM et al. Insight into the prebiotic concept: lessons from an exploratory, double blind intervention study with inulin-type fructans in obese women. *Gut* 2013; 62: 1112-21.
19. Costabile A, Kolida S, Klinder A, Gietl E, Bauerlein M, Froberg C et al. A double-blind, placebo-controlled, cross-over study to establish the bifidogenic effect of a very-long-chain inulin extracted from globe artichoke (*Cynara scolymus*) in healthy human subjects. *Br J Nutr* 2010; 104: 1007-17.
20. Benus RF, van der Werf TS, Welling GW, Judd PA, Taylor MA, Harmsen HJ et al. Association between *Faecalibacterium prausnitzii* and dietary fibre in colonic fermentation in healthy human subjects. *Br J Nutr* 2010; 104: 693-700.
21. Lecerf JM, Depeint F, Clerc E, Dugenet Y, Niamba CN, Rhazi L et al. Xylo-oligosaccharide (XOS) in combination with inulin modulates both the intestinal environment and immune status in healthy subjects, while XOS alone only shows prebiotic properties. *Br J Nutr* 2012; 108: 1847-58.
22. Vulevic J, Juric A, Tzortzis G, Gibson GR. A mixture of trans-galactooligosaccharides reduces markers of metabolic syndrome and modulates the fecal microbiota and immune function of overweight adults. *J Nutr* 2013; 143: 324-31.
23. Vivatvakin B, Mahayosnond A, Theamboonlers A, Steenhout PG, Conus NJ. Effect of a whey-predominant starter formula containing LCPUFAs and oligosaccharides (FOS/GOS) on gastrointestinal comfort in infants. *Asia Pac J Clin Nutr* 2010; 19: 473-80.
24. Hooda S, Boler BM, Serao MC, Brulc JM, Staeger MA, Boileau TW et al. 454 pyrosequencing reveals a shift in fecal microbiota of healthy adult men consuming polydextrose or soluble corn fiber. *J Nutr* 2012; 142: 1259-65.
25. Costabile A, Fava F, Roytio H, Forssten SD, Olli K, Klievink J et al. Impact of polydextrose on the faecal microbiota: a double-blind, crossover, placebo-controlled feeding study in healthy human subjects. *Br J Nutr* 2012; 108: 471-81.

26. Baer DJ, Stote KS, Henderson T, Paul DR, Okuma K, Tagami H et al. The Metabolizable Energy of Dietary Resistant Maltodextrin Is Variable and Alters Fecal Microbiota Composition in Adult Men. *J Nutr* 2014; 144: 1023-9.
27. Walton GE, Lu C, Trogh I, Arnaut F, Gibson GR. A randomised, double-blind, placebo controlled cross-over study to determine the gastrointestinal effects of consumption of arabinoxylan-oligosaccharides enriched bread in healthy volunteers. *Nutr J* 2012; 11: 36.
28. Cloetens L, Broekaert WF, Delaedt Y, Ollevier F, Courtin CM, Delcour JA et al. Tolerance of arabinoxylan-oligosaccharides and their prebiotic activity in healthy subjects: a randomised, placebo-controlled cross-over study. *Br J Nutr* 2010; 103: 703-13.
